# Supplementary material for: Systemic Inflammation and Complement Activation Parameters Predict Clinical Outcome of Severe SARS-CoV-2 Infections
Source: MDPI journal article supplement (doi:10.3390/v13122376), 2021-11-26
Supplement: s1 [file s1]

**Systemic Inflammation and Complement Activation Parameters Predict Clinical Outcome of Severe SARS-CoV-2 Infections**

Supplementary Materials

Silke Huber <sup>1,†</sup>, Mariam Massri <sup>1,†</sup>, Marco Grasse <sup>1</sup>, Verena Fleischer <sup>1</sup>, Sára Kellnerová <sup>1</sup>, Verena Harpf <sup>1</sup>, Ludwig Knabl <sup>2</sup>, Ludwig Knabl Sr. <sup>3</sup>, Tatjana Heiner <sup>4</sup>, Moritz Kummann <sup>5</sup>, Magdalena Neuraüter <sup>1</sup>, Günter Rambach <sup>1</sup>, Cornelia Speth <sup>1</sup> and Reinhard Würzner <sup>1,\*</sup>

\*Corresponding author

<sup>†</sup>These authors contributed equally to this work

<sup>1</sup>Institute of Hygiene and Medical Microbiology, Medical University of Innsbruck, Innsbruck, Austria

<sup>2</sup>Pathology Laboratory, 6511 Zams, Austria

<sup>3</sup>Department of Internal Medicine, Hospital St. Vinzenz, 6511 Zams, Austria

<sup>4</sup>Department of Anesthesia and Intensive Care Medicine, Hospital Reutte, 6600 Reutte, Austria

<sup>5</sup>Department of Radiology. Medical University of Innsbruck, 6020 Innsbruck, Austria

Correspondence to:

Ao. Univ.-Prof. Dr.med. Reinhard Würzner, PhD

Institute of Hygiene and Medical Microbiology

Medical University of Innsbruck

Schöpfstrasse 41

6020 Innsbruck, Austria

Email: reinhard.wuerzner@i-med.ac.at

Phone: +43 (0)512 9003 70707

**Table S1.** List of bacterial and viral secondary respiratory infections in patients and healthy controls. Individuals not represented in this table had negative results for both analyses.

|                         | Bacterial Infections                 | Viral Infections             |
|-------------------------|--------------------------------------|------------------------------|
| <b>Patients</b>         |                                      |                              |
| Patient 1               | yeast, <i>Escherichia coli</i>       | negative                     |
| Patient 3               | <i>Aspergillus fumigatus</i> complex | negative                     |
| Patient 6               | yeast                                | negative                     |
| Patient 7               | <i>Escherichia coli</i>              | negative                     |
| Patient 8               | yeast                                | negative                     |
| Patient 9               | <i>Aspergillus fumigatus</i> complex | negative                     |
| Patient 11              | yeast                                | negative                     |
| <b>Healthy controls</b> |                                      |                              |
| Healthy Control 6       | negative                             | Enterovirus, Influenza (low) |
| Healthy Control 9       | <i>Moraxella catarrhalis</i>         | Rhinovirus                   |
| Healthy Control 13      | Yeast                                | negative                     |

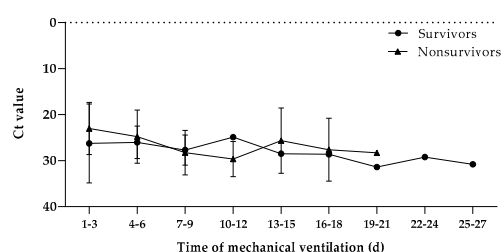

(a)

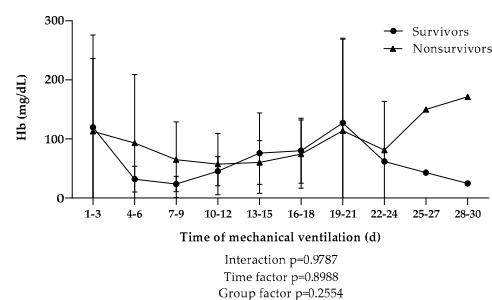

(b)

**Figure S1.** Kinetics of Ct values and hemoglobin in tracheal fluid. (a) Ct values and (b) hemoglobin (Hb) levels in tracheal fluid of COVID-19 patients that survived (n=4) or died (n=7) during the course of mechanical ventilation. Data is shown as mean  $\pm$  SD. Dotted lines indicate the mean value in the control group. P-values were calculated by linear mixed model of clustered log-transformed data.

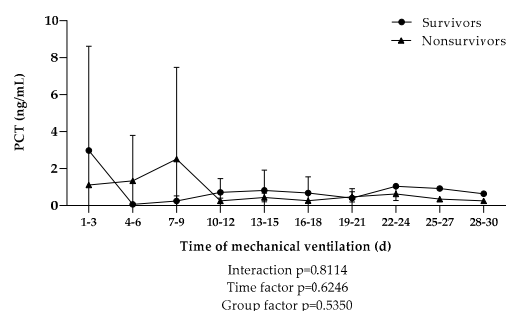

(a)

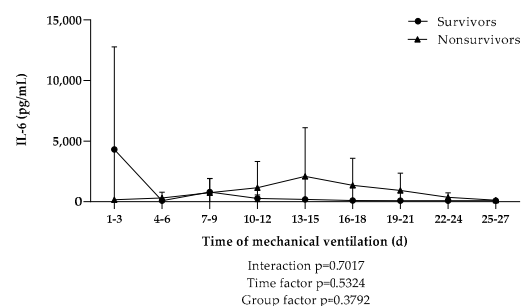

(b)

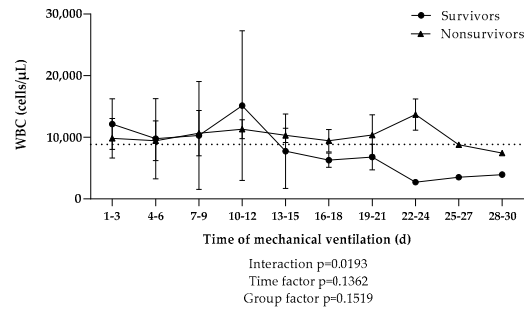

(c)

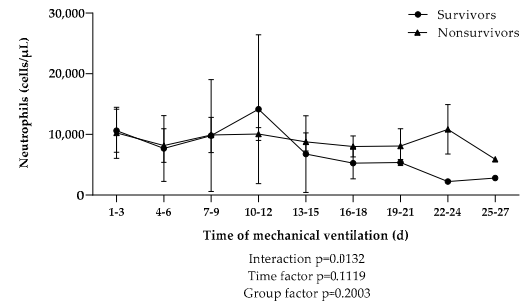

(d)

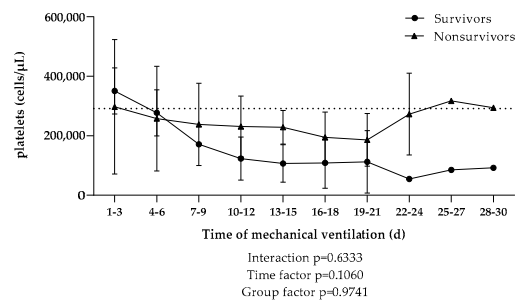

(e)

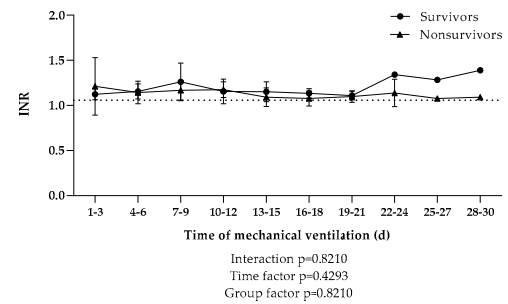

(f)

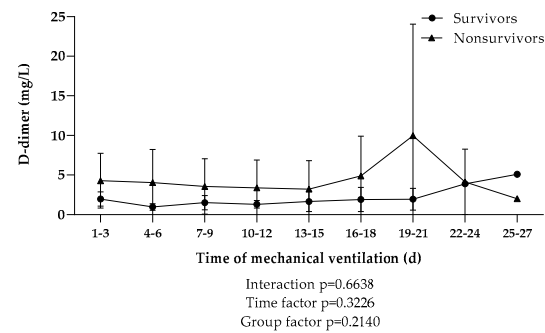

(g)

**Figure S2.** Kinetics of common systemic inflammation and coagulation markers. (a) procalcitonin (PCT), (b) interleukin-6 (IL-6), (c) white blood cell (WBC) count, (d) neutrophil count, (e) platelets count, (f) international normalized rate (INR), and (g) D-dimer during course of mechanical ventilation of COVID-19 patients that survived (n=5) or died (n=7). Data is shown as mean  $\pm$  SD. Dotted lines indicate the mean value in the control group. P-values were calculated by linear mixed model of clustered log-transformed data.

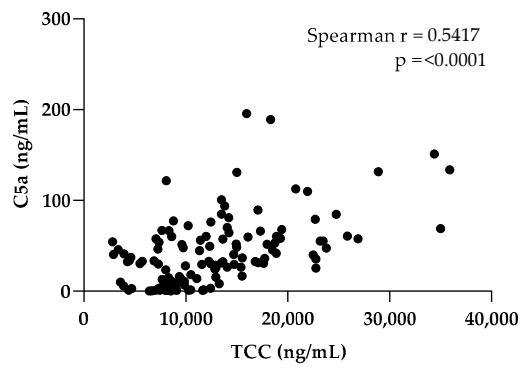

(a)

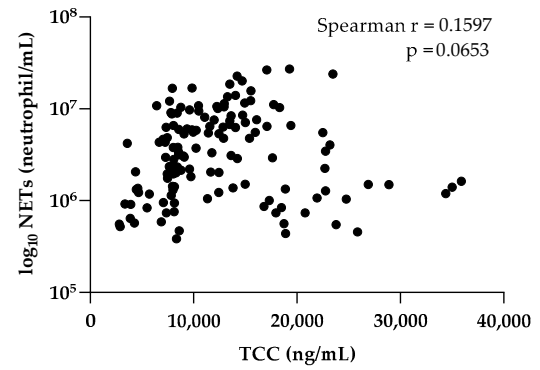

(b)

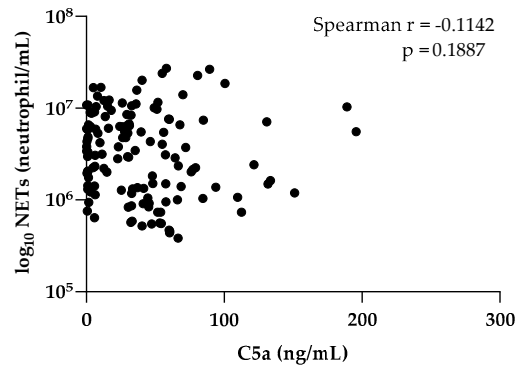

(c)

**Figure S3.** Correlation between systemic complement activation products and NETosis. (a) C5a *vs.* TCC, (b) NETs release *vs.* TCC, and (c) release of NETs *vs.* C5a. Correlation coefficient was assessed using the Spearman rank correlation test. Values indicate Spearman  $r$ . CRP: C-reactive protein, PCT: procalcitonin, IL-6: interleukin 6, WBC: white blood cell count, INR: international normalized rate, TCC: terminal complement complex, NETs: neutrophilic extracellular traps.  $p < 0.02$  were considered significant after Bonferroni correction for multiple testing.

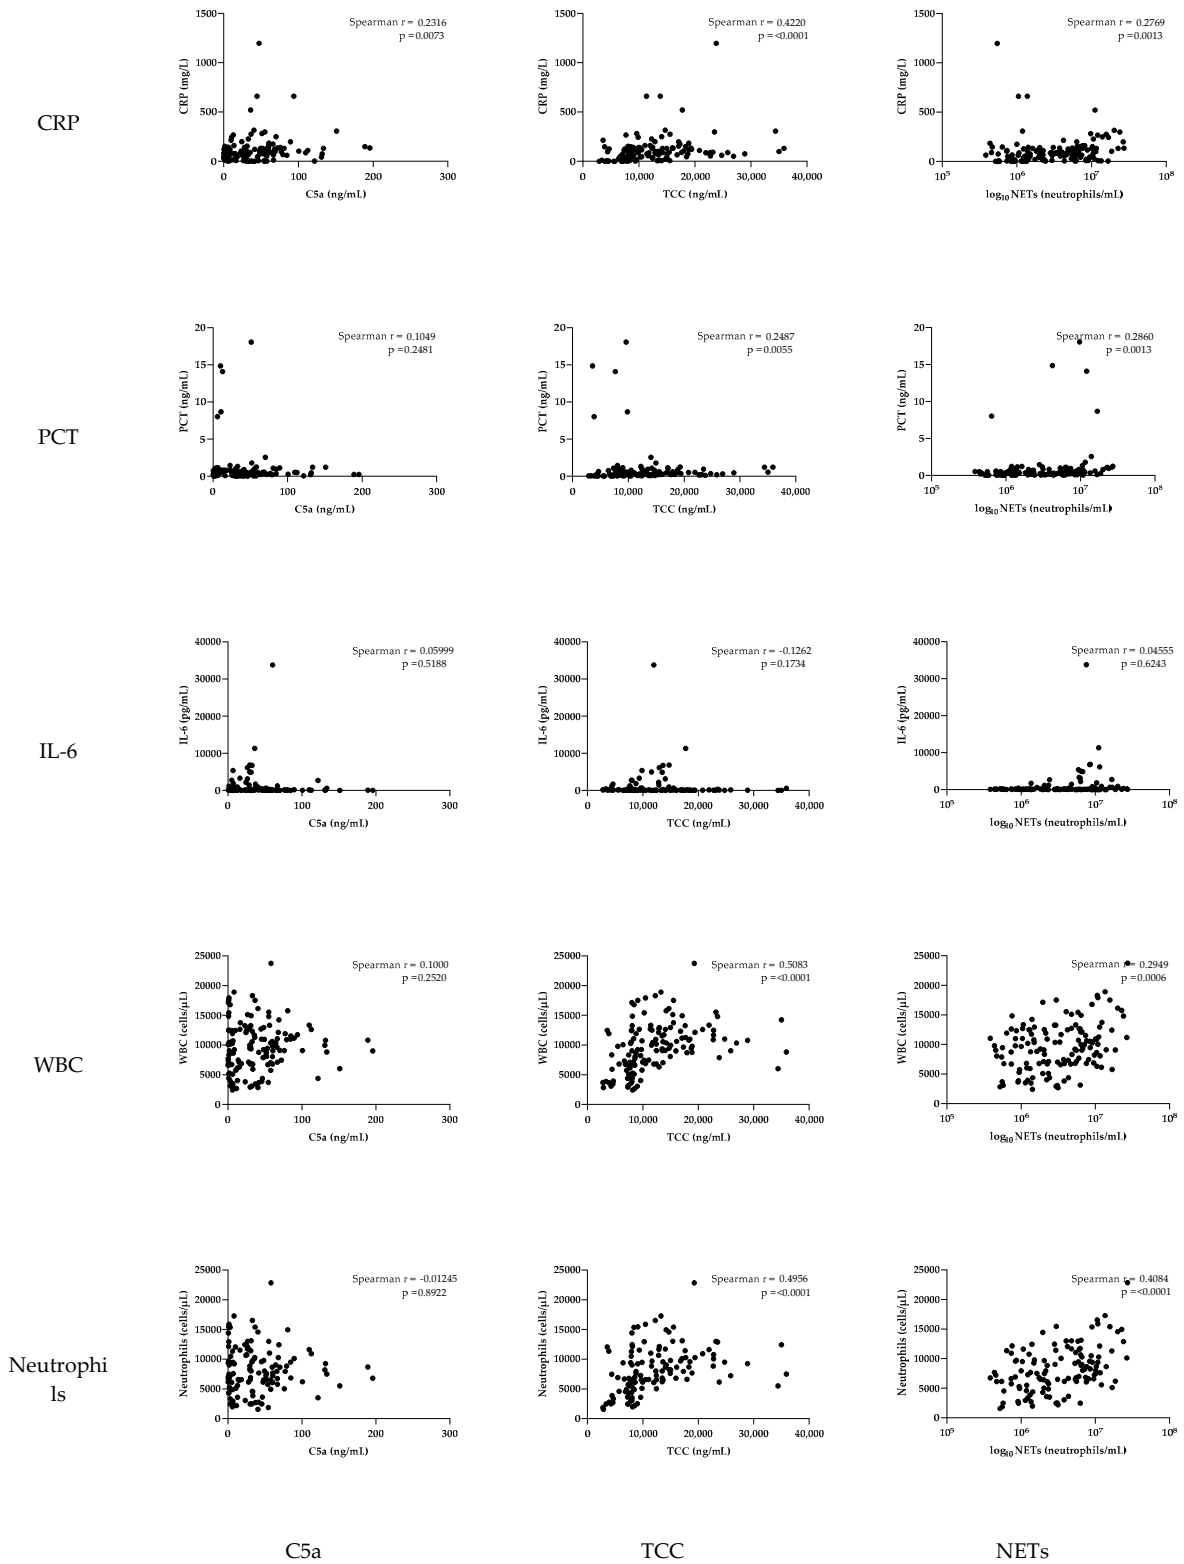

**Figure S4.** Correlation of serum complement activation products and NETs release with common inflammation markers. Correlation coefficient was assessed using the Spearman rank correlation test. CRP: C-reactive protein, PCT: procalcitonin, IL-6: interleukin 6, WBC: white blood cell count, INR: international normalized rate, TCC: terminal complement complex, NETs: neutrophilic extracellular traps.  $p < 0.002$  were considered significant after Bonferroni correction for multiple testing.

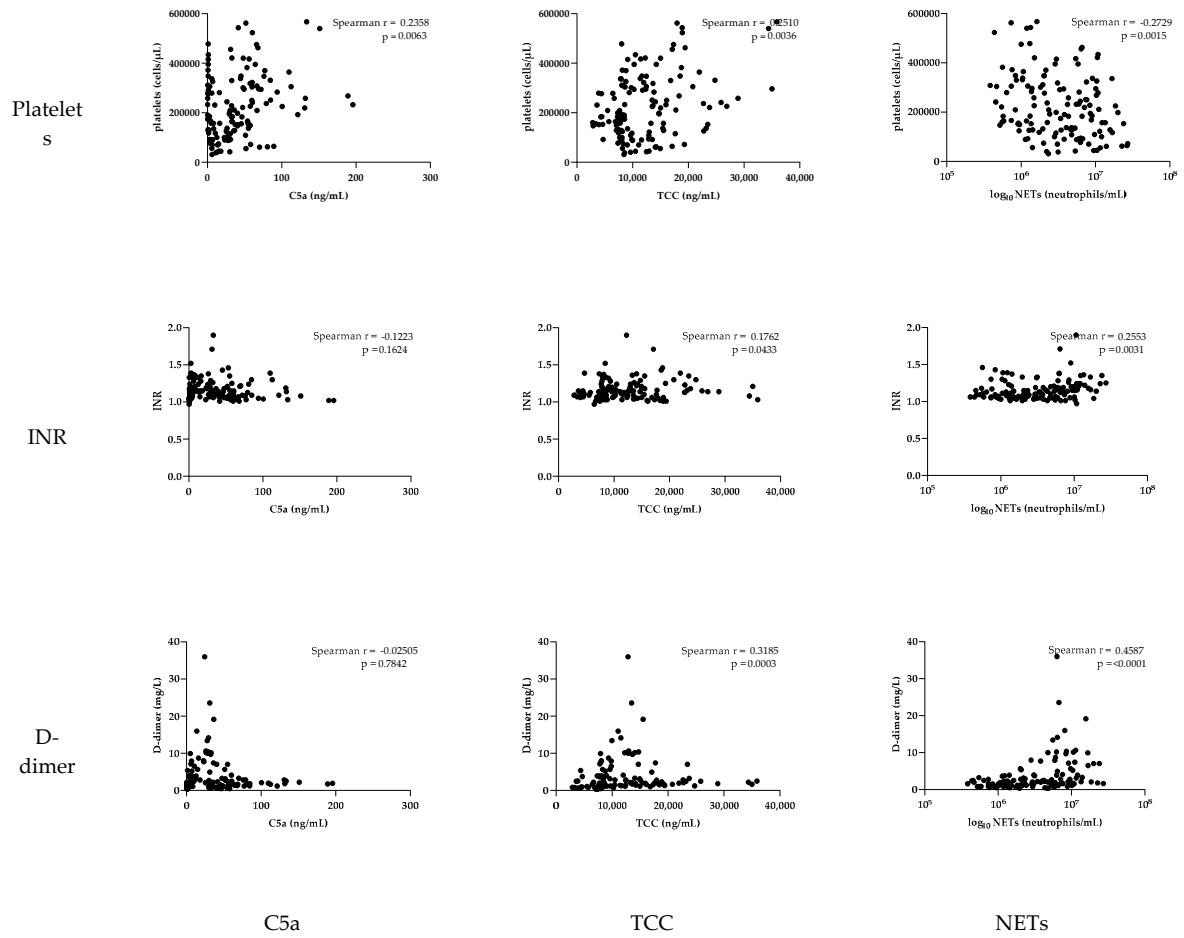

**Figure S5.** Correlation of serum complement activation products and NETs release with common coagulation markers. Correlation coefficient was assessed using the Spearman rank correlation test. CRP: C-reactive protein, PCT: procalcitonin, IL-6: interleukin 6, WBC: white blood cell count, INR: international normalized rate, TCC: terminal complement complex, NETs: neutrophilic extracellular traps.  $p < 0.006$  were considered significant after Bonferroni correction for multiple testing.

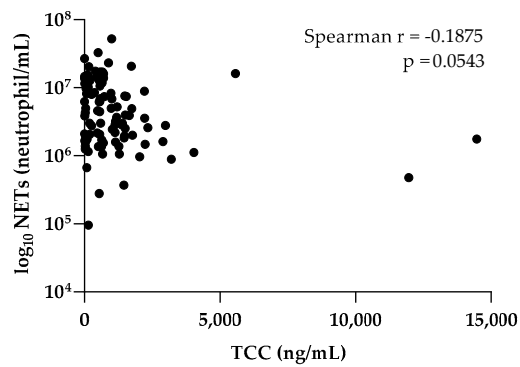

(a)

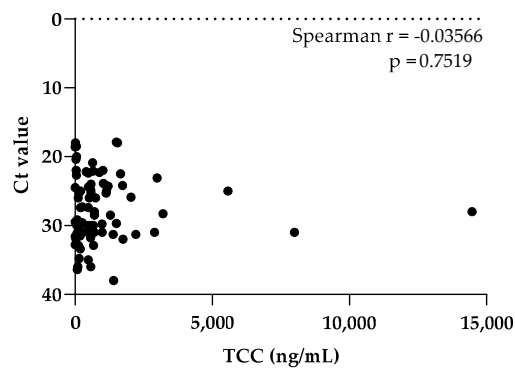

(b)

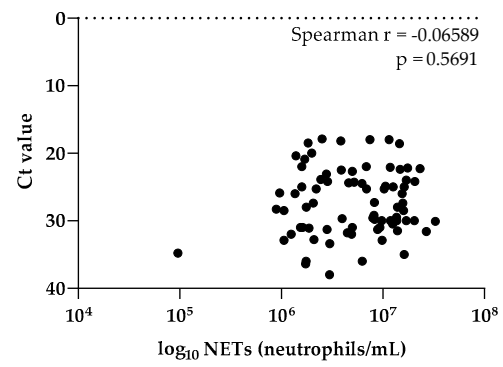

(c)

**Figure S6.** Correlation between complement activation products and NETosis in tracheal fluid of COVID-19 patients. (a) C5a *vs.* terminal complement complex (TCC), (b) (neutrophilic extracellular traps) NETs release *vs.* TCC, and (c) release of NETs *vs.* C5a. Correlation coefficient was assessed using the Spearman rank correlation test.  $p < 0.02$  were considered significant after Bonferroni correction for multiple testing.

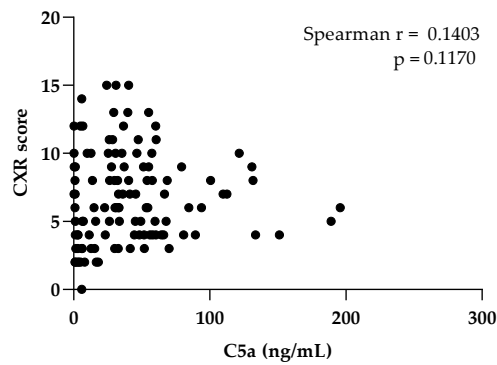

(a)

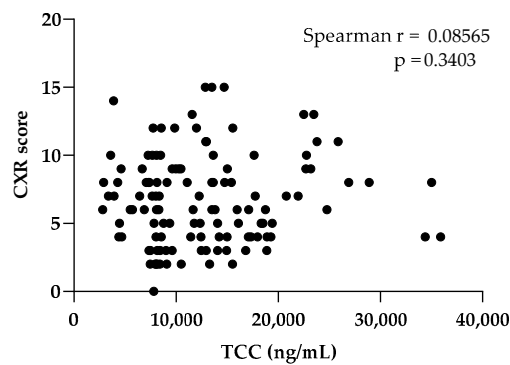

(b)

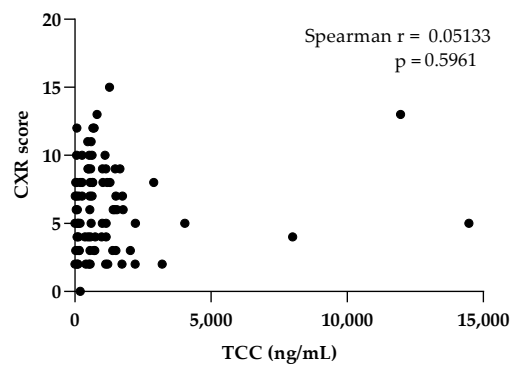

(c)

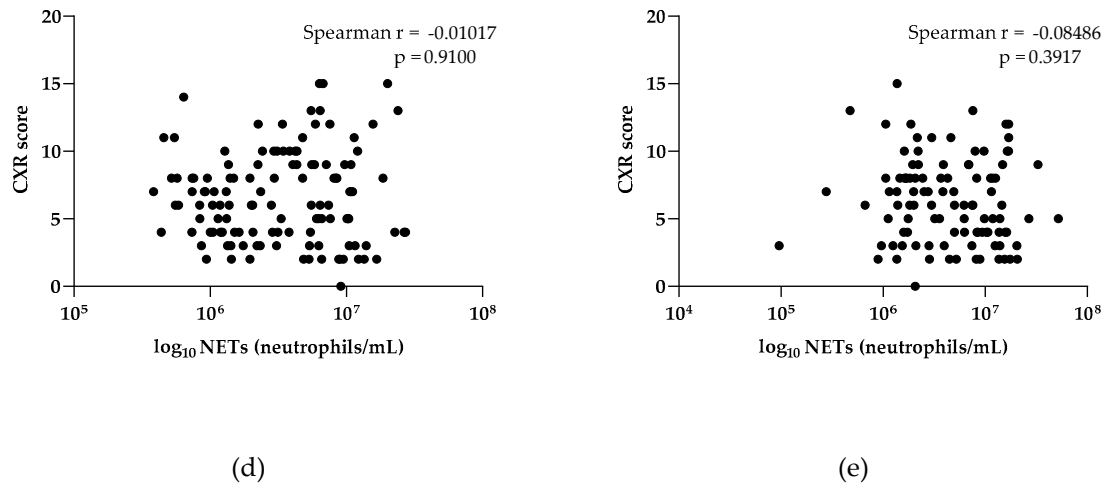

**Figure S7.** Correlation between chest x-ray (CXR) scores and complement activation products or NETosis in COVID-19 patients. (a) CXR score *vs.* C5a in serum, (b) CXR score *vs.* terminal complement complex (TCC) in serum, (c) CXR score *vs.* TCC in tracheal fluid (d) CXR score *vs.* release of neutrophilic extracellular traps (NETs) in serum, and (e) CXR score *vs.* release of neutrophilic extracellular traps (NETs) in tracheal fluid. Correlation coefficient was assessed using the Spearman rank correlation test.  $p < 0.01$  were considered significant after Bonferroni correction for multiple testing.

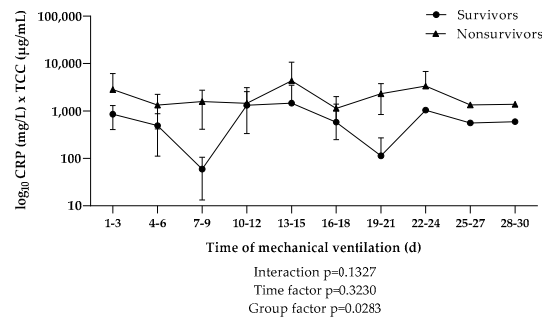

**Figure S8.** Kinetics of a ratio of systemic inflammation and complement activation marker. A ratio consisting systemic C-reactive protein (CRP) and terminal complement complex (TCC) levels in COVID-19 patients that survived ( $n=4$ ) or died ( $n=7$ ) during the course of mechanical ventilation. Data is shown as mean  $\pm$  SD. P-values were calculated by linear mixed model of clustered log-transformed data.
